# Supplementary material for: Kawasaki Disease and Vaccination: Prospective Case-Control and Case-Crossover Studies among Infants in Japan
Source: MDPI journal article supplement (doi:10.3390/vaccines9080839), 2021-07-30
Supplement: s1 [file s1]

**Table S1.** Clinical features of patients with Kawasaki disease.

| Clinical features                                  | (n)   | KD                |
|----------------------------------------------------|-------|-------------------|
| Day of diagnosis (days) <sup>1</sup>               | (102) | 4 (2–9)           |
| Fever                                              | (102) | 102 (100%)        |
| Conjunctival injection                             | (102) | 97 (95.1%)        |
| Erythema of lips and strawberry tongue             | (102) | 89 (87.3%)        |
| Cervical lymphadenopathy                           | (102) | 74 (72.5%)        |
| Rash                                               | (102) | 99 (97.1%)        |
| Erythema and edema of the hands and feet           | (102) | 95 (93.1%)        |
| Incomplete KD                                      | (102) | 8 (7.8%)          |
| Risk score <sup>1,2</sup>                          | (101) | 3 (1–9)           |
| Neutrophil (%) <sup>1</sup>                        | (101) | 57.3 (20.8–81.5)  |
| Platelet count (x10 <sup>4</sup> /μL) <sup>1</sup> | (101) | 40.3 (7.0–99.0)   |
| AST (U/L) <sup>1</sup>                             | (101) | 35 (18–471)       |
| Sodium (mEq/L) <sup>1</sup>                        | (101) | 136 (131–146)     |
| C-reactive protein (mg/dL) <sup>1</sup>            | (101) | 6.97 (2.05–41.88) |
| IVIG-refractory                                    | (99)  | 16 (16.2%)        |
| Coronary artery aneurysms                          | (102) | 14 (12.7%)        |

*n*: number of patients, KD: Kawasaki disease, AST: aspartate aminotransferase, IVIG: intravenous immunoglobulin, <sup>1</sup>: median (range), <sup>2</sup>: according to reference [1].

**Table S2.** Multivariable analysis with patient background and each vaccine as fixed variables.

| (a)                                                          | OR   | (95%CI)     | <i>p</i> |
|--------------------------------------------------------------|------|-------------|----------|
| Age (months)                                                 | 2.13 | (1.32–3.44) | 0.002    |
| Sex (male)                                                   | 0.53 | (0.21–1.36) | 0.19     |
| Breast feeding                                               | 2.32 | (0.57–9.50) | 0.24     |
| Baby food                                                    | 2.44 | (0.82–7.27) | 0.11     |
| History of allergic disease                                  | 0.33 | (0.09–1.23) | 0.10     |
| Symptoms of infection within 2 months before hospitalization | 0.96 | (0.39–2.34) | 0.93     |
| Antibiotic use within 2 months before hospitalization        | 0.90 | (0.28–2.85) | 0.85     |
| Sibling(s)                                                   | 0.60 | (0.29–1.26) | 0.18     |
| Family history of KD                                         | 1.91 | (0.48–7.62) | 0.36     |
| Housing style (detached house)                               | 1.61 | (0.70–3.73) | 0.26     |
| PCV13                                                        | 0.98 | (0.32–2.95) | 0.97     |
| (b)                                                          | OR   | (95%CI)     | <i>p</i> |
| Age (months)                                                 | 2.16 | (1.33–3.50) | 0.002    |
| Sex (male)                                                   | 0.54 | (0.21–1.37) | 0.19     |
| Breast feeding                                               | 2.41 | (0.58–9.99) | 0.23     |
| Baby food                                                    | 2.52 | (0.84–7.58) | 0.10     |
| History of allergic disease                                  | 0.33 | (0.09–1.25) | 0.10     |
| Symptoms of infection within 2 months before hospitalization | 0.96 | (0.39–2.35) | 0.93     |
| Antibiotic use within 2 months before hospitalization        | 0.88 | (0.28–2.78) | 0.83     |
| Sibling(s)                                                   | 0.58 | (0.28–1.21) | 0.15     |
| Family history of KD                                         | 1.88 | (0.47–7.55) | 0.38     |
| Housing style (detached house)                               | 1.58 | (0.68–3.67) | 0.28     |
| HBV vaccine                                                  | 0.78 | (0.28–2.17) | 0.64     |
| (c)                                                          | OR   | (95%CI)     | <i>p</i> |

|                                                              |      |              |       |
|--------------------------------------------------------------|------|--------------|-------|
| Age (months)                                                 | 2.38 | (1.43–3.96)  | 0.001 |
| Sex (male)                                                   | 0.54 | (0.22–1.37)  | 0.20  |
| Breast feeding                                               | 2.64 | (0.61–11.53) | 0.20  |
| Baby food                                                    | 2.71 | (0.88–8.33)  | 0.08  |
| History of allergic disease                                  | 0.27 | (0.07–1.10)  | 0.07  |
| Symptoms of infection within 2 months before hospitalization | 1.00 | (0.40–2.47)  | 1.00  |
| Antibiotic use within 2 months before hospitalization        | 0.84 | (0.26–2.67)  | 0.77  |
| Sibling(s)                                                   | 0.53 | (0.25–1.10)  | 0.09  |
| Family history of KD                                         | 1.80 | (0.43–7.62)  | 0.42  |
| Housing style (detached house)                               | 1.62 | (0.69–3.82)  | 0.27  |
| DPT-IPV                                                      | 0.39 | (0.14–1.09)  | 0.07  |

| (d)                                                          | OR   | (95%CI)     | <i>p</i> |
|--------------------------------------------------------------|------|-------------|----------|
| Age (months)                                                 | 2.10 | (1.30–3.39) | 0.002    |
| Sex (male)                                                   | 0.53 | (0.21–1.36) | 0.19     |
| Breast feeding                                               | 2.28 | (0.56–9.21) | 0.25     |
| Baby food                                                    | 2.38 | (0.80–7.08) | 0.12     |
| History of allergic disease                                  | 0.34 | (0.09–1.25) | 0.10     |
| Symptoms of infection within 2 months before hospitalization | 0.95 | (0.39–2.33) | 0.91     |
| Antibiotic use within 2 months before hospitalization        | 0.92 | (0.29–2.92) | 0.88     |
| Sibling(s)                                                   | 0.62 | (0.29–1.30) | 0.20     |
| Family history of KD                                         | 1.92 | (0.48–7.63) | 0.35     |
| Housing style (detached house)                               | 1.63 | (0.71–3.78) | 0.25     |
| Hib vaccine                                                  | 1.19 | (0.37–3.85) | 0.77     |

| (e)                                                          | OR   | (95%CI)     | <i>p</i> |
|--------------------------------------------------------------|------|-------------|----------|
| Age (months)                                                 | 2.10 | (1.31–3.36) | 0.002    |
| Sex (male)                                                   | 0.51 | (0.20–1.33) | 0.17     |
| Breast feeding                                               | 2.38 | (0.59–9.66) | 0.22     |
| Baby food                                                    | 2.39 | (0.81–7.06) | 0.11     |
| History of allergic disease                                  | 0.36 | (0.10–1.33) | 0.12     |
| Symptoms of infection within 2 months before hospitalization | 0.96 | (0.40–2.33) | 0.93     |
| Antibiotic use within 2 months before hospitalization        | 0.90 | (0.28–2.87) | 0.86     |
| Sibling(s)                                                   | 0.64 | (0.30–1.34) | 0.24     |
| Family history of KD                                         | 1.91 | (0.47–7.72) | 0.36     |
| Housing style (detached house)                               | 1.66 | (0.72–3.83) | 0.24     |
| Rotavirus vaccine                                            | 1.32 | (0.62–2.77) | 0.47     |

| (f)                                                          | OR   | (95%CI)      | <i>p</i> |
|--------------------------------------------------------------|------|--------------|----------|
| Age (months)                                                 | 2.27 | (1.38–3.74)  | 0.001    |
| Sex (male)                                                   | 0.54 | (0.21–1.38)  | 0.20     |
| Breast feeding                                               | 2.43 | (0.58–10.15) | 0.22     |
| Baby food                                                    | 2.81 | (0.91–8.67)  | 0.07     |
| History of allergic disease                                  | 0.31 | (0.08–1.18)  | 0.09     |
| Symptoms of infection within 2 months before hospitalization | 0.92 | (0.37–2.27)  | 0.85     |
| Antibiotic use within 2 months before hospitalization        | 0.89 | (0.28–2.81)  | 0.84     |
| Sibling(s)                                                   | 0.55 | (0.26–1.18)  | 0.12     |

|                                |      |             |      |
|--------------------------------|------|-------------|------|
| Family history of KD           | 1.87 | (0.46–7.60) | 0.38 |
| Housing style (detached house) | 1.74 | (0.74–4.10) | 0.21 |
| BCG vaccine                    | 0.58 | (0.17–1.96) | 0.38 |

A multivariable analysis was performed with each vaccine ((a) PCV13, (b) HBV vaccine, (c) DPT-IPV, (d) Hib vaccine, (e) Rotavirus vaccine, or (f) BCG vaccine) and 10 fixed variables using conditional logistic regression analysis. OR: Odds ratio, 95% CI: 95% confidence interval, KD: Kawasaki disease, PCV13: 13-valent pneumococcal conjugate vaccine, HBV: Hepatitis B virus, DPT-IPV: Diphtheria, pertussis, tetanus and inactivated poliovirus vaccine, Hib: *Haemophilus influenzae* type b, BCG: *Bacillus Calmette-Guérin*.

**Table S3.** Case-crossover study limited to the first dose of each vaccine.

|                    | Number of Subjects<br>Who Received Vaccine<br>in the Case Period | Number of Subjects<br>Who Received Vaccine<br>in the Control Period | IR <sub>MH</sub> | (95% CI)     |
|--------------------|------------------------------------------------------------------|---------------------------------------------------------------------|------------------|--------------|
| <b>(S) 7 days</b>  |                                                                  |                                                                     |                  |              |
| PCV13              | 2                                                                | 4                                                                   | <b>0.50</b>      | (0.09–2.73)  |
| HBV vaccine        | 2                                                                | 2                                                                   | <b>1.00</b>      | (0.14–7.10)  |
| DPT-IPV            | 2                                                                | 2                                                                   | <b>1.00</b>      | (0.14–7.10)  |
| Hib vaccine        | 2                                                                | 3                                                                   | <b>0.67</b>      | (0.11–3.99)  |
| Rotavirus vaccine  | 2                                                                | 1                                                                   | <b>2.00</b>      | (0.18–22.06) |
| BCG vaccine        | 2                                                                | 3                                                                   | <b>0.67</b>      | (0.11–3.99)  |
| <b>(L) 28 days</b> |                                                                  |                                                                     |                  |              |
| PCV13              | 8                                                                | 14                                                                  | <b>0.57</b>      | (0.24–1.36)  |
| HBV vaccine        | 9                                                                | 11                                                                  | <b>0.82</b>      | (0.34–1.97)  |
| DPT-IPV            | 9                                                                | 9                                                                   | <b>1.00</b>      | (0.39–2.52)  |
| Hib vaccine        | 8                                                                | 14                                                                  | <b>0.57</b>      | (0.23–1.36)  |
| Rotavirus vaccine  | 6                                                                | 9                                                                   | <b>0.67</b>      | (0.24–1.87)  |
| BCG vaccine        | 7                                                                | 17                                                                  | <b>0.41</b>      | (0.17–0.99)  |

IR<sub>MH</sub>: Mantel–Haenszel incidence ratio, 95% CI: 95% confidence interval, PCV13: 13-valent pneumococcal conjugate vaccine, HBV: Hepatitis B virus, DPT-IPV: Diphtheria, pertussis, tetanus, and inactivated poliovirus vaccine, Hib: *Haemophilus influenzae* type b, BCG: *Bacillus Calmette-Guérin*.

**Table S4.** Vaccines, adjuvants, and corresponding pattern recognition receptors.

| Vaccines           | Antigens                          | Adjuvants |                                     | Pattern Recognition Receptors     |
|--------------------|-----------------------------------|-----------|-------------------------------------|-----------------------------------|
|                    |                                   | Alum      | Others                              |                                   |
| Live-attenuated    |                                   |           |                                     |                                   |
| Rotavirus vaccine  | Attenuated rotavirus              | -         |                                     | TLR3, MDA5, RIG-I                 |
| BCG vaccine        | BCG                               | -         | self-adjuvant (CWS, ssRNA, CpG DNA) | TLR2, TLR4, TLR8, TLR9, NODs, CLR |
| Non-live composite |                                   |           |                                     |                                   |
| PCV13              | Polysaccharide, diphtheria toxoid | +         |                                     | NLRP3, TLR2, TLR4, NOD1 & 2       |
| HBV vaccine        | Recombinant HBs antigen           | +         |                                     | NLRP3, TLR                        |
| DPT-IPV            | DPT, inactivated polio            | +         |                                     | NLRP3, TLR                        |
| Hib vaccine        | OMPC, tetanus toxoid              | -         |                                     | TLR2, TLR4                        |

Data were collected from references [2–5]. BCG: *Bacillus Calmette-Guérin*, PCV13: 13-valent pneumococcal conjugate, HBV: Hepatitis B virus, DPT-IPV: Diphtheria, pertussis tetanus, and inactivated polio vaccine, Hib: *Haemophilus influenzae* type b, OMPC: outer membrane protein complex,

CWS: cell wall skeleton that consists of peptidoglycan, arabinogalactan, and mycolic acids, CLR: C-type lectin receptor, MDA5: melanoma differentiation-associated gene 5, NLR: nucleotide-binding oligomerization domain (NOD)-like receptor, NLRP3: nucleotide-binding oligomerization domain-like receptor family: pyrin domain-containing 3, NOD: nucleotide oligomerization domain, RIG-I: retinoic acid-inducible gene I, TLR: toll-like receptor.

## References

1. Kobayashi, T.; Inoue, Y.; Takeuchi, K.; Okada, Y.; Tamura, K.; Tomomasa, T.; Kobayashi, T.; Morikawa, A. Prediction of intravenous immunoglobulin unresponsiveness in patients with Kawasaki disease. *Circulation* **2006**, *113*, 2606–2612, doi:10.1161/CIRCULATIONAHA.105.592865.
2. Philbin, V.J.; Levy, O. Developmental biology of the innate immune response: implications for neonatal and infant vaccine development. *Pediatr Res* **2009**, *65*, 98r–105r, doi:10.1203/PDR.0b013e31819f195d.
3. Pulendran, B.; Ahmed, R. Immunological mechanisms of vaccination. *Nat Immunol* **2011**, *12*, 509–517, doi:10.1038/ni.2039.
4. Holloway, G.; Coulson, B.S. Innate cellular responses to rotavirus infection. *J Gen Virol* **2013**, *94*, 1151–1160, doi:10.1099/vir.0.051276-0.
5. Saso, A.; Kampmann, B. Vaccine responses in newborns. *Seminars in immunopathology* **2017**, *39*, 627–642, doi:10.1007/s00281-017-0654-9.
